# Supplementary material for: Production of multiple bacteriocins, including the novel bacteriocin gassericin M, by Lactobacillus gasseri LM19, a strain isolated from human milk
Source: PubMed Central journal article supplement (PMC7162838; doi:10.1007/s00253-020-10493-3), 2020-03-13
Supplement: 253_2020_10493_MOESM1_ESM.pdf [file 253_2020_10493_MOESM1_ESM.pdf]

Applied Microbiology and Biotechnology

Production of multiple bacteriocins, including the novel bacteriocin gassericin M, by *Lactobacillus gasseri* LM19, a strain isolated from human milk

Supplementary Information

Enriqueta Garcia-Gutierrez<sup>1,2</sup> 0000-0001-5683-7924

Paula M. O'Connor<sup>2,3</sup> 0000-0001-6462-2077

Ian J. Colquhoun<sup>1</sup>

Natalia M. Vior<sup>4</sup> 0000-0003-1890-3884

Juan Miguel Rodríguez<sup>5</sup>

Melinda J. Mayer<sup>1</sup> 0000-0002-8764-2836

Paul D. Cotter<sup>2,3\*</sup> 0000-0002-5465-9068

Arjan Narbad<sup>1</sup>

<sup>1</sup> Gut Microbes and Health Institute Strategic Programme, Quadram Institute Bioscience, Norwich, UK

<sup>2</sup> Food Bioscience Department Teagasc Food Research Centre, Moorepark, Fermoy, Cork, Ireland

<sup>3</sup> APC Microbiome Ireland, University College Cork, Cork, Ireland

<sup>4</sup> Molecular Microbiology, John Innes Centre, Norwich, UK

<sup>5</sup> Dpt. Nutrition and Food Science, Complutense University of Madrid, Madrid, Spain

\*Corresponding author:

Paul D. Cotter

paul.cotter@teagasc.ie

Tel. +353 (0)25 42694; +353 (0)76 1112694 (Lync)

**Table S1** Relative gene expression levels of different bacteriocin genes from *L. gasseri* LM19 grown in MRS supplemented with different carbon sources.

|                          |      | No supplemental carbon source | Glucose | Lactose | Galactose | Inulin | Starch | Pectin |
|--------------------------|------|-------------------------------|---------|---------|-----------|--------|--------|--------|
| <i>Helveticin J-like</i> | 24 h | 2.21                          | 0.81    | 0.37    | 0.94      | 2.10   | 6.09   | 3.20   |
|                          |      | 2.98                          | 0.94    | 0.89    | 0.87      | 2.13   | 8.23   | 2.33   |
|                          |      | 3.14                          | 1.24    | 1.79    | 1.42      | 2.34   | 4.58   | 3.46   |
|                          | 48 h | 1.53                          | 1.11    | 2.12    | 0.92      | 3.16   | 2.61   | 4.68   |
|                          |      | 2.01                          | 1.20    | 1.91    | 0.53      | 1.80   | 2.33   | 1.70   |
|                          |      | 1.78                          | 0.67    | 2.51    | 1.07      | 0.79   | 2.45   | 3.55   |
| <i>gamA</i>              | 24 h | 3.18                          | 0.75    | 1.01    | 1.64      | 0.11   | 1.37   | 0.21   |
|                          |      | ND                            | 0.57    | 1.06    | 2.26      | 0.08   | 0.71   | 0.38   |
|                          |      | 1.55                          | 1.67    | 0.54    | 1.16      | 0.09   | 1.54   | 0.32   |
|                          | 48 h | 0.87                          | 1.03    | 0.63    | 1.05      | 0.31   | 0.13   | 0.39   |
|                          |      | 1.11                          | 1.15    | 0.45    | 1.49      | 0.65   | 0.78   | 0.47   |
|                          |      | 0.47                          | 0.81    | 0.59    | 0.88      | 0.39   | ND     | 0.45   |
| <i>gamX</i>              | 24 h | ND                            | 0.80    | 0.44    | 0.43      | 0.21   | 0.70   | 0.39   |
|                          |      | 3.62                          | 0.78    | 0.90    | 2.11      | 0.18   | 0.62   | 0.34   |
|                          |      | 1.86                          | 1.40    | 0.52    | 1.34      | 0.13   | 2.21   | 0.33   |
|                          | 48 h | 1.12                          | 1.04    | 0.78    | 1.13      | 0.83   | 1.26   | 0.52   |
|                          |      | 1.05                          | 1.33    | 0.58    | 0.93      | 1.15   | 0.80   | 0.45   |
|                          |      | 1.13                          | 0.62    | 0.70    | 0.42      | 0.81   | ND     | 0.51   |
| <i>bact_1</i>            | 24 h | 0.00                          | 0.40    | 1.09    | 1.80      | 0.58   | 0.01   | 0.20   |
|                          |      | 0.00                          | 0.97    | 0.81    | 1.69      | 0.80   | 0.03   | 0.29   |
|                          |      | 0.95                          | 1.62    | 0.99    | 0.99      | 0.93   | 0.07   | 0.82   |
|                          | 48 h | 0.03                          | 1.09    | 1.15    | 1.97      | 0.82   | 0.00   | 0.80   |
|                          |      | 0.02                          | 0.75    | 1.47    | 2.04      | 0.80   | 0.00   | 0.82   |
|                          |      | 0.02                          | 1.15    | 1.09    | 1.01      | 0.98   | 0.00   | 0.69   |
| <i>bact_2</i>            | 24 h | 0.01                          | 0.57    | 0.71    | 0.65      | 0.42   | 0.06   | 0.13   |
|                          |      | ND                            | 0.38    | 0.68    | 1.24      | 0.31   | 0.01   | 0.20   |
|                          |      | 0.29                          | 2.04    | 1.34    | 1.20      | 0.69   | 0.04   | 0.68   |
|                          | 48 h | 0.04                          | 1.00    | 1.43    | 2.15      | 0.55   | ND     | 0.94   |
|                          |      | 0.03                          | 0.80    | 2.12    | 1.31      | 0.63   | 0.01   | 1.00   |
|                          |      | 0.03                          | 1.19    | 1.78    | 0.77      | 0.59   | 0.00   | 0.05   |

Values are relative to the expression of each gene in glucose supplemented cultures after 24h incubation; ND, not detected

### HPLC I

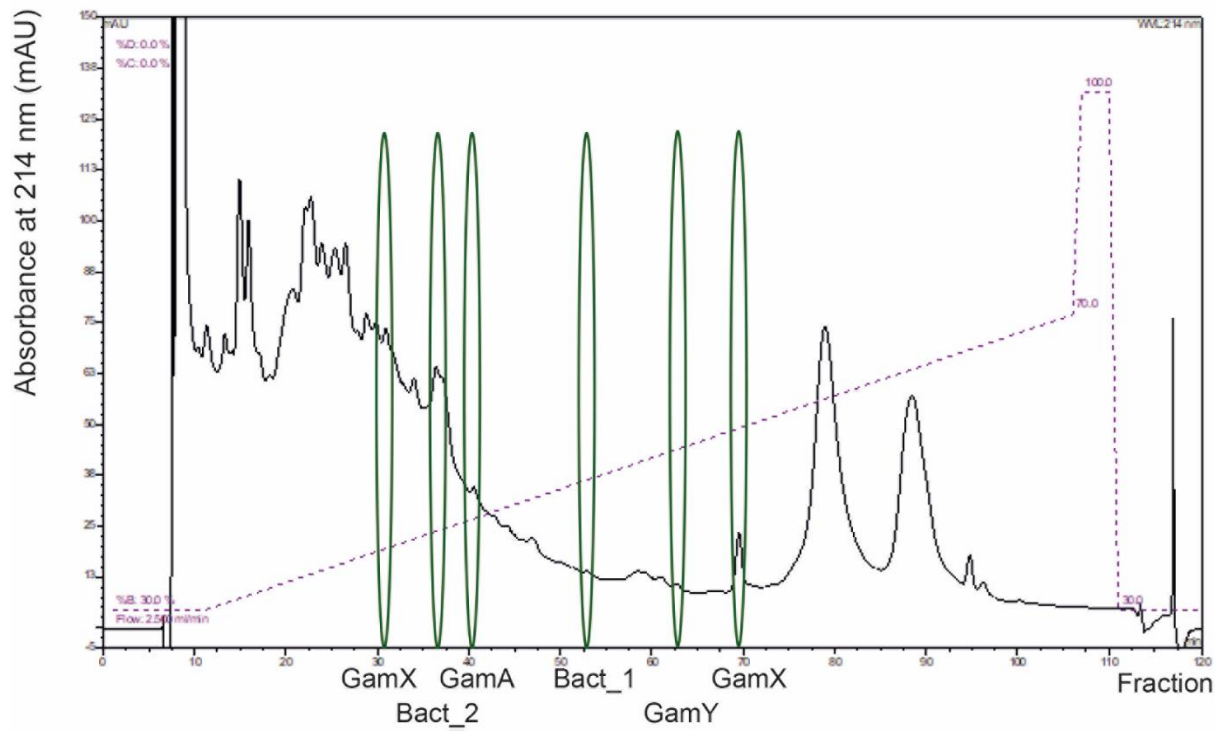

**Fig S1** HPLC chromatogram showing fractionation I of *L. gasseri* LM19 cell extracts; MALDI TOF MS chromatograms of these fractions are shown in Figure S3. These fractions were purified further (see Fig. S2).

## HPLC II

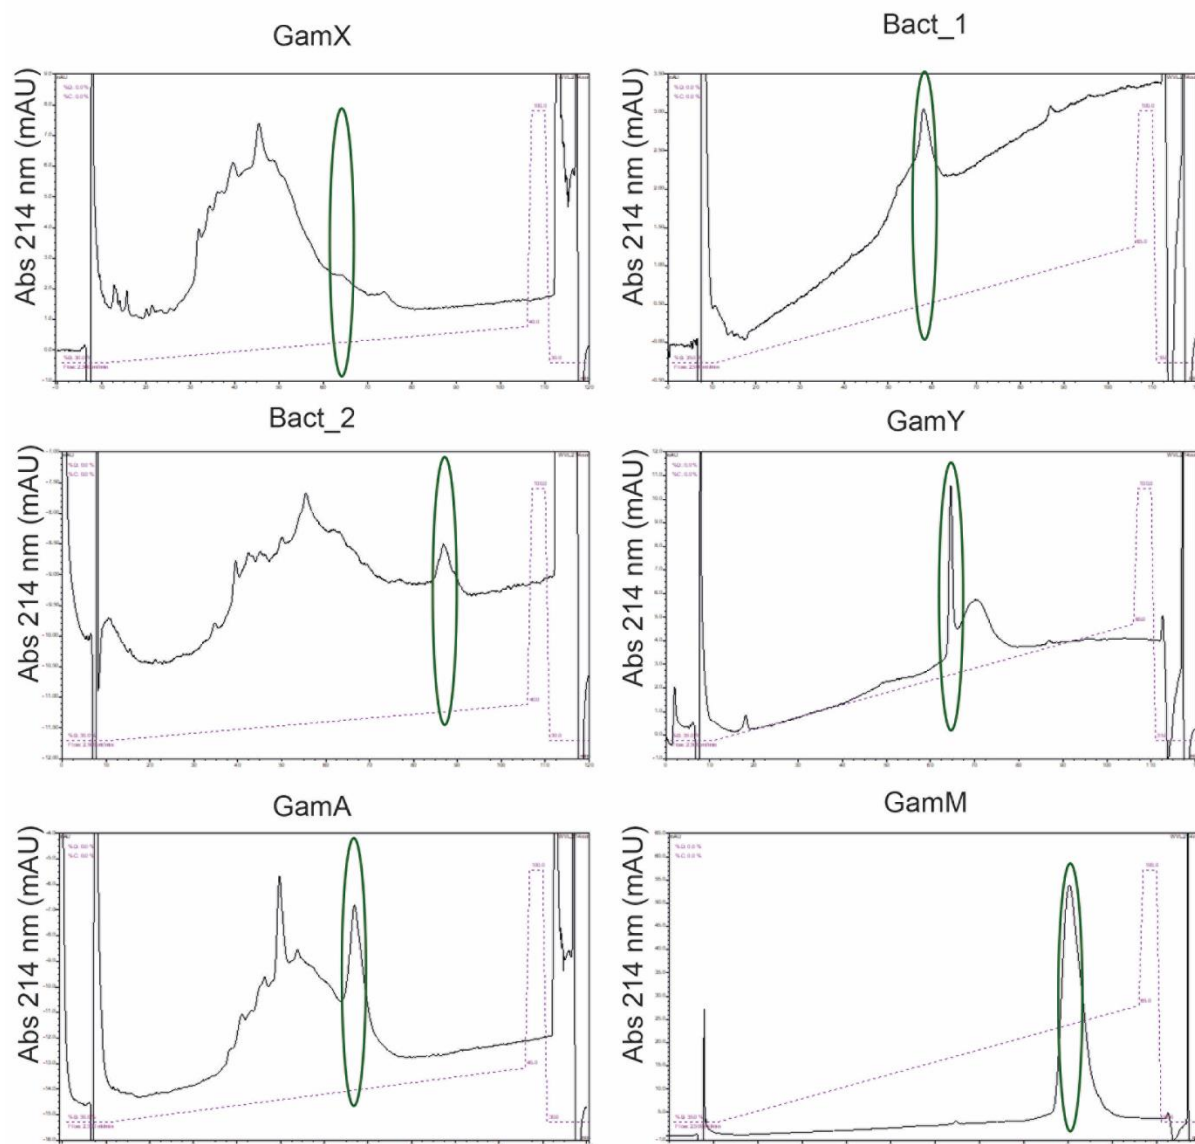

**Fig S2** HPLC chromatograms from HPLC fractionation II of *L. gasseri* LM19 cell extracts fractions; absorbance peaks associated with putative bacteriocins (see titles) are encircled; MS chromatograms of these fractions are shown in Figure S3.

HPLC I

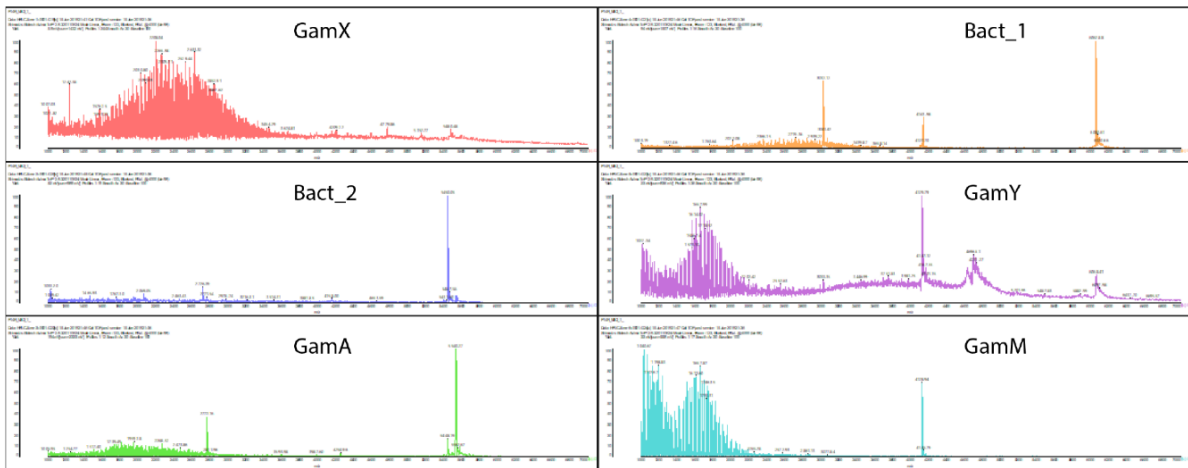

HPLC II

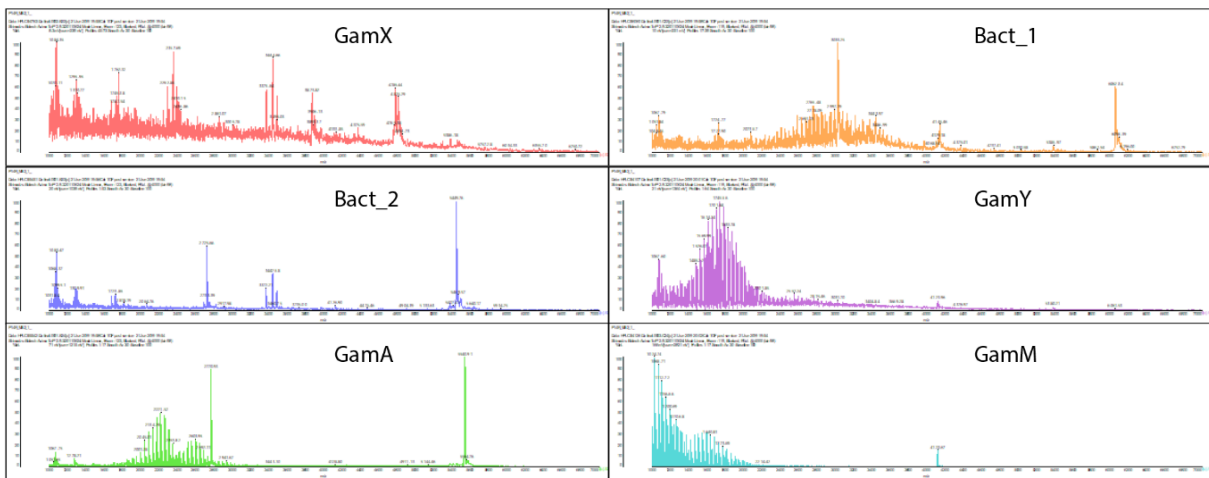

SYNTHETIC PEPTIDES

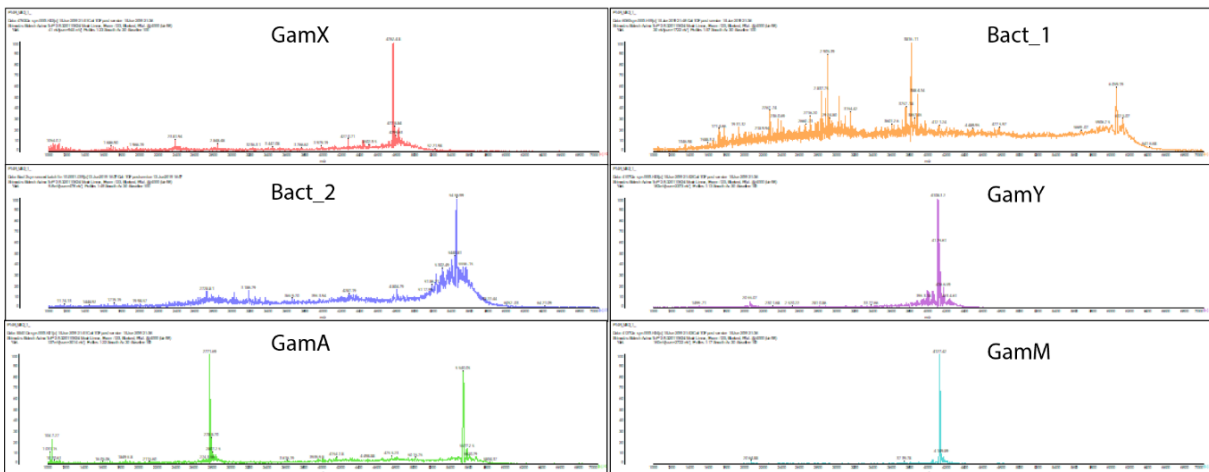

**Fig S3** MALDI TOF MS chromatograms of cell extract fractions showing antimicrobial activity from HPLC fractionation I HPLC fractionation II, and synthetic peptides.
